# Supplementary material for: Sex-specific correlates of valvular and arterial calcification burden in patients with moderate aortic stenosis
Source: HighWire-hosted journal article supplement (doi:10.1136/openhrt-2022-002139), 2022-12-01
Supplement: openhrt-2022-002139supp001_data_supplement.pdf [file openhrt-2022-002139supp001_data_supplement.pdf]

## **Online supplementary material for the article**

### **SEX-SPECIFIC CORRELATES OF VALVULAR AND ARTERIAL CALCIFICATION**

### **BURDEN IN PATIENTS WITH MODERATE AORTIC STENOSIS**

Marianne Deslandes, MD\*, Amélie Paquin, MD, MSc\*, Ezequiel Guzzetti, MD, Jonathan Beaudoin, MD, Alexandra Barriault, MD, Erwan Salaun, MD, PhD, Marie-Annick Clavel, DVM, PhD

**Figure S1: Flow chart and available calcification scores for each territory**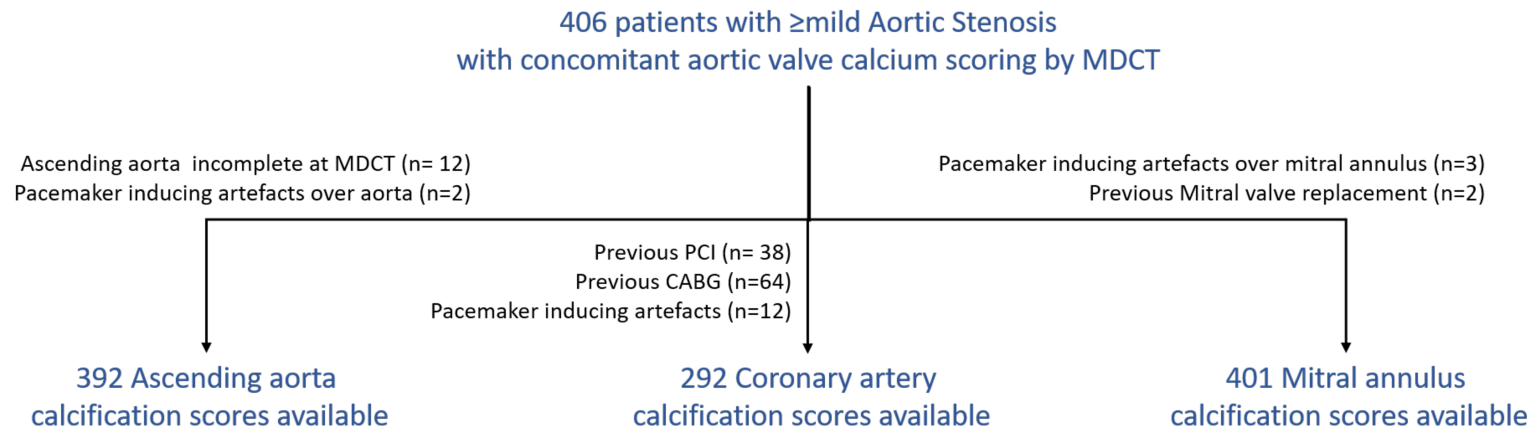

Legend: CABG: Coronary artery bypass graft; MDCT: Multidetector computed tomography; PCI: Percutaneous coronary intervention

**Figure S2: Bland-Altman representation of intra-observer variability**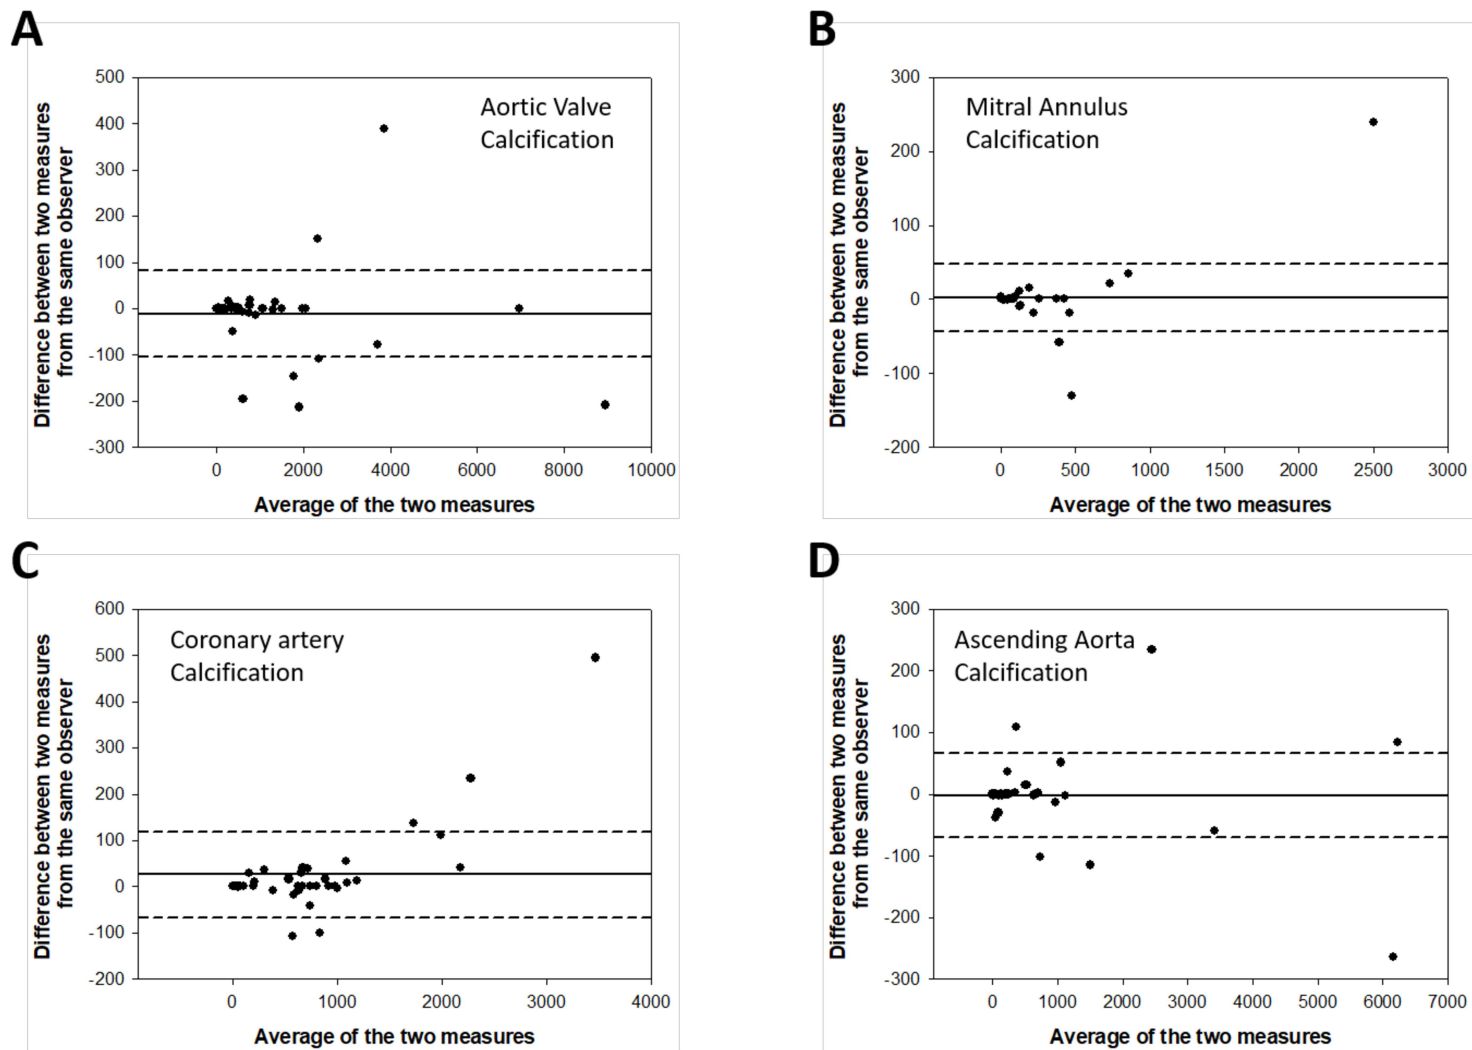

**Figure S3: Bland-Altman representation of intra-observer variability**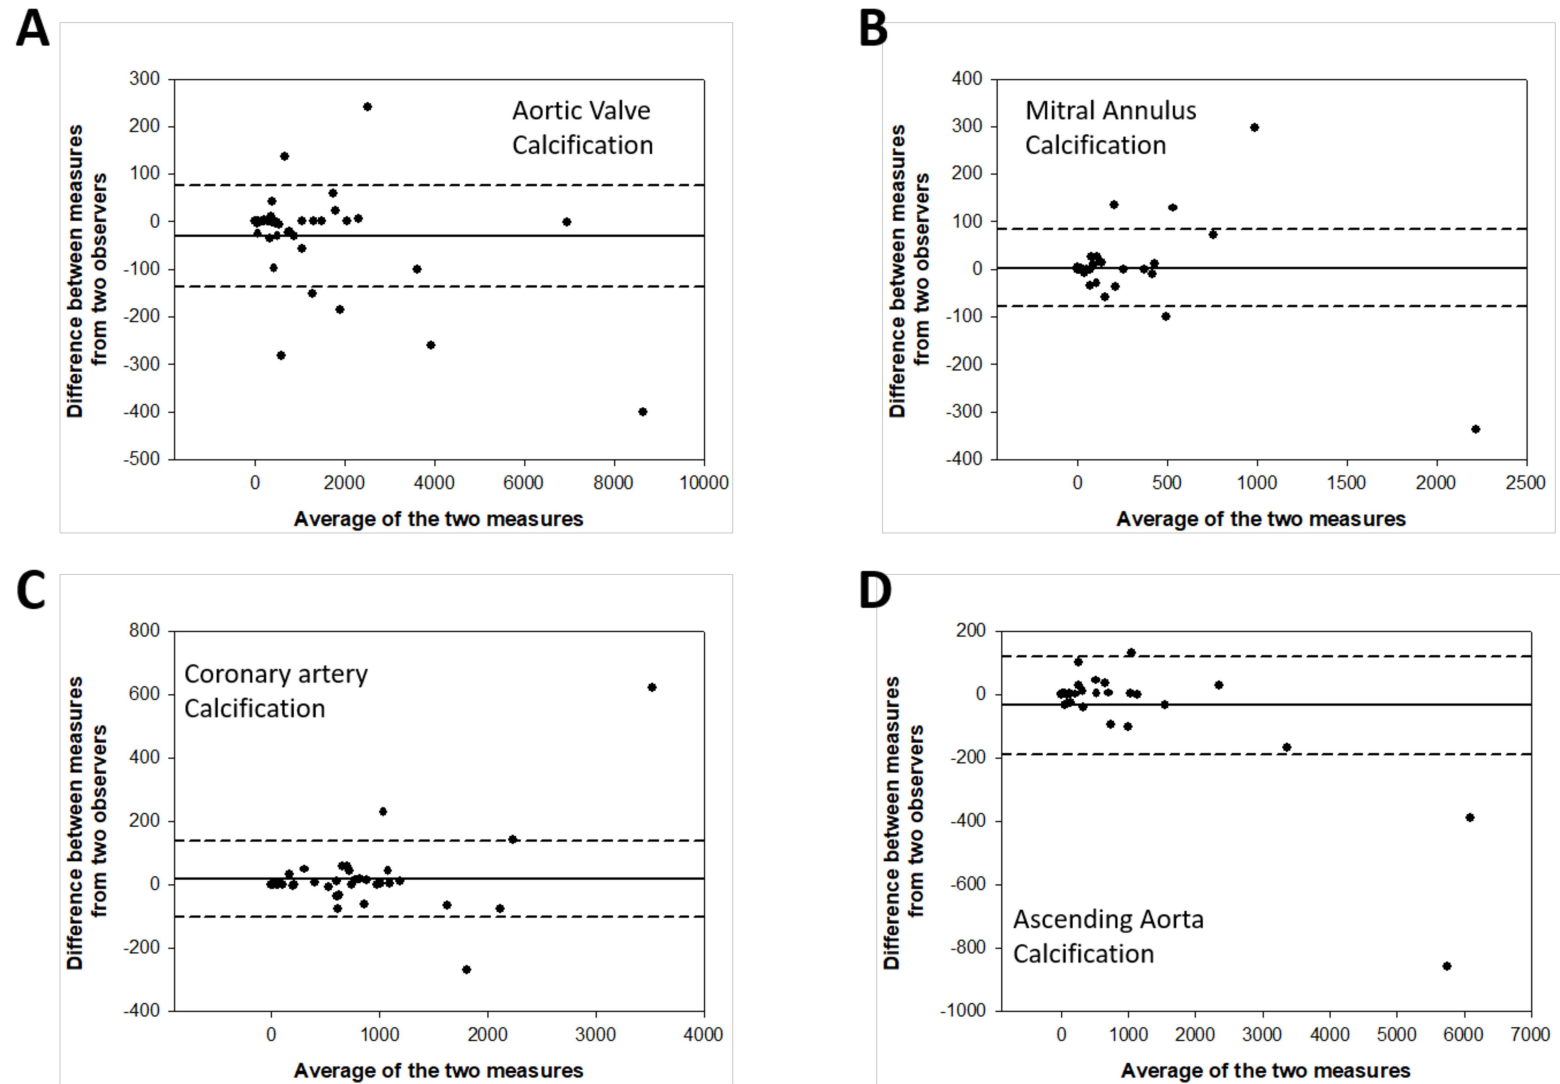

**Table S1: Multivariate analysis of ascending aorta calcification load in the whole cohort, in women and in men**

|                                         | Whole Cohort  |               |             |              | Women       |             | Men         |             |
|-----------------------------------------|---------------|---------------|-------------|--------------|-------------|-------------|-------------|-------------|
|                                         | Coef.         | Std. Err.     | Beta        | p            | Beta        | p           | Beta        | p           |
| Male sex                                | -149.91       | 151.33        | -0.07       | 0.32         | -           | -           | -           | -           |
| Age (per year)                          | 5.96          | 5.51          | 0.07        | 0.28         | 0.11        | 0.32        | -0.002      | 0.98        |
| Body surface area (per m <sup>2</sup> ) | 47.4          | 309.77        | 0.01        | 0.88         | 0.11        | 0.23        | -0.05       | 0.54        |
| Diabetes                                | 51.82         | 137.57        | 0.02        | 0.71         | 0.1         | 0.37        | -0.02       | 0.81        |
| Hyperlipidemia                          | <b>287.57</b> | <b>137.04</b> | <b>0.13</b> | <b>0.04</b>  | 0.12        | 0.24        | 0.15        | 0.06        |
| eGFR<60 ml/min                          | 150.11        | 158.92        | 0.06        | 0.35         | -0.08       | 0.45        | 0.14        | 0.08        |
| Vitamin K antagonist                    | <b>390.44</b> | <b>168.03</b> | <b>0.14</b> | <b>0.02</b>  | <b>0.24</b> | <b>0.01</b> | 0.02        | 0.76        |
| Bisphosphonate                          | 296.35        | 211.55        | 0.1         | 0.16         | 0.17        | 0.14        | 0.003       | 0.97        |
| Calcium and/or Vitamin D                | -48.87        | 82.29         | -0.04       | 0.55         | -0.12       | 0.26        | 0.05        | 0.57        |
| CAC (per AU)                            | <b>0.16</b>   | <b>0.06</b>   | <b>0.18</b> | <b>0.004</b> | 0.13        | 0.21        | <b>0.22</b> | <b>0.01</b> |
| MAC (per AU)                            | -0.02         | 0.04          | -0.02       | 0.70         | -           | -           | -           | -           |

*CAC*, coronary artery calcification; *eGFR*, estimated glomerular filtration rate; *MAC*, mitral annular calcification.

In bold statistically significant results

**Table S2: Univariable analysis of aortic valve calcification load in the whole cohort, in women and in men**

|                                         | Whole Cohort   |               |              |                   | Women        |                   | Men          |                   |
|-----------------------------------------|----------------|---------------|--------------|-------------------|--------------|-------------------|--------------|-------------------|
|                                         | Coef.          | Std. Err.     | Beta         | p                 | Beta         | p                 | Beta         | p                 |
| Male Sex                                | <b>784.15</b>  | <b>159.61</b> | <b>0.24</b>  | <b>&lt;0.0001</b> | -            | -                 | -            | -                 |
| Age (per year)                          | <b>23.54</b>   | <b>6.78</b>   | <b>0.17</b>  | <b>0.001</b>      | <b>0.29</b>  | <b>0.001</b>      | <b>0.19</b>  | <b>0.002</b>      |
| Body surface area (per m <sup>2</sup> ) | 466.04         | 331.5         | 0.07         | 0.16              | <b>-0.20</b> | <b>0.02</b>       | -0.03        | 0.66              |
| Hypertension                            | 342.78         | 204.95        | 0.08         | 0.10              | 0.08         | 0.34              | 0.1          | 0.11              |
| Hyperlipidemia                          | 266.01         | 191.09        | 0.07         | 0.17              | -0.01        | 0.90              | 0.08         | 0.17              |
| Diabetes                                | -157.71        | 163.53        | -0.05        | 0.34              | -0.02        | 0.82              | <b>-0.06</b> | <b>0.36</b>       |
| Coronary artery disease                 | <b>420.62</b>  | <b>155.01</b> | <b>0.13</b>  | <b>0.01</b>       | 0.07         | 0.41              | 0.13         | 0.03              |
| eGFR<60 ml/min                          | <b>406.41</b>  | <b>192.23</b> | <b>0.1</b>   | <b>0.04</b>       | <b>0.23</b>  | <b>0.01</b>       | 0.1          | 0.10              |
| Current smoker                          | -142.51        | 237.25        | -0.03        | 0.55              | 0.005        | 0.96              | -0.05        | 0.44              |
| Bicuspid Aortic Valve                   | <b>680.15</b>  | <b>195.11</b> | <b>0.17</b>  | <b>0.001</b>      | 0.01         | 0.92              | <b>0.19</b>  | <b>0.001</b>      |
| ACE inhibitor                           | 194.22         | 166.37        | 0.06         | 0.24              | 0.11         | 0.21              | 0.01         | 0.87              |
| ARB                                     | -110.06        | 163.62        | -0.03        | 0.50              | -0.15        | 0.09              | 0.003        | 0.96              |
| Vitamin K antagonist                    | 6.46           | 210.64        | 0.002        | 0.98              | 0.05         | 0.59              | 0.02         | 0.70              |
| Statin                                  | 210.45         | 179.61        | 0.06         | 0.24              | -0.09        | 0.32              | 0.08         | 0.19              |
| Bisphosphonate                          | -344.07        | 238.6         | -0.07        | 0.15              | -0.005       | 0.96              | -0.01        | 0.89              |
| Calcium and/or vitamin D                | <b>-325.29</b> | <b>103.87</b> | <b>-0.15</b> | <b>0.002</b>      | -0.03        | 0.69              | -0.003       | 0.96              |
| CAC                                     | <b>0.17</b>    | <b>0.09</b>   | <b>0.11</b>  | <b>0.05</b>       | <b>0.22</b>  | <b>0.02</b>       | 0.05         | 0.51              |
| MAC                                     | <b>0.26</b>    | <b>0.05</b>   | <b>0.25</b>  | <b>&lt;0.0001</b> | <b>0.37</b>  | <b>&lt;0.0001</b> | <b>0.27</b>  | <b>&lt;0.0001</b> |
| Asc. aorta calcification                | -0.07          | 0.07          | -0.06        | 0.27              | 0.01         | 0.93              | -0.06        | 0.32              |

Asc., ascending; ACE, angiotensin-converting enzyme; ARB, angiotensin-receptor blocker; AVC, aortic valve calcification; CAC, coronary artery calcification; eGFR, estimated glomerular filtration rate; MAC, mitral annular calcification. In bold, statistically significant results.

**Table S3: Univariable analysis of mitral annular calcification load in the whole cohort, in women and in men**

|                                         | Whole Cohort   |               |             |                   |  | Women       |                   | Men         |                   |
|-----------------------------------------|----------------|---------------|-------------|-------------------|--|-------------|-------------------|-------------|-------------------|
|                                         | Coef.          | Std. Err.     | Beta        | p                 |  | Beta        | p                 | Beta        | p                 |
| Male Sex                                | <b>-301.61</b> | <b>160.84</b> | <b>0.09</b> | <b>0.05</b>       |  | -           | -                 | -           | -                 |
| Age (per year)                          | <b>25.27</b>   | <b>6.62</b>   | <b>0.19</b> | <b>&lt;0.0001</b> |  | <b>0.28</b> | <b>0.001</b>      | <b>0.12</b> | <b>0.05</b>       |
| Body surface area (per m <sup>2</sup> ) | -1.51          | 326.76        | 0.0002      | 1.00              |  | 0.03        | 0.71              | 0.07        | 0.24              |
| Hypertension                            | <b>446.06</b>  | <b>199.81</b> | <b>0.11</b> | <b>0.03</b>       |  | 0.16        | 0.07              | 0.09        | 0.16              |
| Hyperlipidemia                          | 198.49         | 187.06        | 0.05        | 0.29              |  | 0.15        | 0.10              | 0.01        | 0.88              |
| Diabetes                                | <b>483.77</b>  | <b>159.1</b>  | <b>0.15</b> | <b>0.001</b>      |  | <b>0.18</b> | <b>0.04</b>       | <b>0.14</b> | <b>0.02</b>       |
| Coronary artery disease                 | <b>320.84</b>  | <b>153.07</b> | <b>0.1</b>  | <b>0.04</b>       |  | <b>0.25</b> | <b>0.004</b>      | 0.04        | 0.50              |
| eGFR<60 ml/min                          | <b>512.48</b>  | <b>189.07</b> | <b>0.13</b> | <b>0.01</b>       |  | 0.09        | 0.30              | <b>0.15</b> | <b>0.01</b>       |
| Current smoker                          | -328.93        | 233.46        | -0.07       | 0.16              |  | -0.12       | 0.17              | -0.04       | 0.49              |
| ACE inhibitor                           | 10.1           | 163.88        | 0.003       | 0.95              |  | 0.07        | 0.43              | -0.01       | 0.89              |
| ARB                                     | 271.26         | 160.37        | 0.08        | 0.09              |  | -0.02       | 0.83              | <b>0.14</b> | <b>0.03</b>       |
| Vitamin K antagonist                    | <b>514.42</b>  | <b>208.31</b> | <b>0.12</b> | <b>0.01</b>       |  | -0.01       | 0.90              | <b>0.19</b> | <b>0.001</b>      |
| Statin                                  | -95.56         | 176.56        | -0.03       | 0.59              |  | -0.13       | 0.14              | 0.04        | 0.49              |
| Bisphosphonate                          | <b>578.17</b>  | <b>231.96</b> | <b>0.12</b> | <b>0.01</b>       |  | 0.1         | 0.25              | 0.11        | 0.07              |
| Calcium and/or vitamin D                | <b>242.22</b>  | <b>102.76</b> | <b>0.12</b> | <b>0.02</b>       |  | 0.16        | 0.06              | <b>0.19</b> | <b>0.002</b>      |
| CAC                                     | 0.14           | 0.08          | 0.1         | 0.08              |  | <b>0.29</b> | <b>0.002</b>      | 0.06        | 0.42              |
| Asc. aorta calcification                | 0.12           | 0.07          | 0.09        | 0.07              |  | 0.14        | 0.12              | 0.04        | 0.49              |
| AVC                                     | <b>0.24</b>    | <b>0.05</b>   | <b>0.25</b> | <b>&lt;0.0001</b> |  | <b>0.37</b> | <b>&lt;0.0001</b> | <b>0.27</b> | <b>&lt;0.0001</b> |

Asc., ascending; ACE, angiotensin-converting enzyme; ARB, angiotensin-receptor blocker; AVC, aortic valve calcification; CAC, coronary artery calcification; eGFR, estimated glomerular filtration rate. In bold, statistically significant results.

**Table S4: Univariable analysis of coronary artery calcification load in the whole cohort, in women and in men**

|                                     | Whole Cohort  |               |             |                   | Women       |                   | Men         |                   |
|-------------------------------------|---------------|---------------|-------------|-------------------|-------------|-------------------|-------------|-------------------|
|                                     | Coef.         | Std. Err.     | Beta        | p                 | Beta        | p                 | Beta        | p                 |
| Male Sex                            | <b>370.36</b> | <b>130.75</b> | <b>0.16</b> | <b>0.005</b>      | -           | -                 | -           | -                 |
| Age (per year)                      | <b>27.34</b>  | <b>5.03</b>   | <b>0.3</b>  | <b>&lt;0.0001</b> | <b>0.45</b> | <b>&lt;0.0001</b> | <b>0.3</b>  | <b>&lt;0.0001</b> |
| Body surface area (m <sup>2</sup> ) | 629.68        | 102.88        | 0.09        | 0.12              | 0.03        | 0.77              | 0.02        | 0.82              |
| Hypertension                        | <b>598.24</b> | <b>152.9</b>  | <b>0.22</b> | <b>&lt;0.0001</b> | <b>0.31</b> | <b>&lt;0.0001</b> | <b>0.22</b> | <b>0.003</b>      |
| Hyperlipidemia                      | <b>414.97</b> | <b>142.57</b> | <b>0.17</b> | <b>0.004</b>      | <b>0.32</b> | <b>&lt;0.0001</b> | 0.12        | 0.11              |
| Diabetes                            | 252.32        | 142.22        | 0.1         | 0.08              | <b>0.21</b> | <b>0.03</b>       | 0.08        | 0.29              |
| Coronary artery disease             | <b>677.78</b> | <b>123.86</b> | <b>0.3</b>  | <b>&lt;0.0001</b> | <b>0.34</b> | <b>&lt;0.0001</b> | <b>0.3</b>  | <b>&lt;0.0001</b> |
| eGFR<60 ml/min                      | 303.8         | 167.74        | 0.11        | 0.07              | 0.15        | 0.12              | 0.11        | 0.14              |
| Current Smoker                      | -67.12        | 192.19        | -0.02       | 0.73              | -0.07       | 0.48              | -0.01       | 0.87              |
| ACE inhibitor                       | <b>414.03</b> | <b>144.37</b> | <b>0.17</b> | <b>0.004</b>      | <b>0.21</b> | <b>0.03</b>       | 0.14        | 0.06              |
| ARB                                 | 147.51        | 137.74        | 0.06        | 0.29              | 0.13        | 0.18              | 0.05        | 0.48              |
| Vitamin K antagonist                | 204.39        | 178.36        | 0.07        | 0.25              | 0.18        | 0.06              | 0.06        | 0.44              |
| Statin                              | <b>346.73</b> | <b>136.51</b> | <b>0.15</b> | <b>0.01</b>       | <b>0.21</b> | <b>0.03</b>       | 0.12        | 0.10              |
| Bisphosphonate                      | 54.78         | 198.72        | 0.02        | 0.78              | <b>0.24</b> | <b>0.01</b>       | -0.03       | 0.64              |
| Calcium and/or vitamin D            | -51.58        | 76.27         | 0.04        | 0.50              | <b>0.22</b> | <b>0.02</b>       | -0.08       | 0.27              |
| MAC                                 | 0.08          | 0.04          | 0.04        | 0.08              | <b>0.29</b> | <b>0.002</b>      | 0.06        | 0.42              |
| AVC                                 | <b>0.08</b>   | <b>0.04</b>   | <b>0.1</b>  | <b>0.05</b>       | <b>0.22</b> | <b>0.02</b>       | 0.05        | 0.51              |
| Asc. aorta calcification            | <b>0.25</b>   | <b>0.06</b>   | <b>0.11</b> | <b>&lt;0.0001</b> | <b>0.29</b> | <b>0.002</b>      | <b>0.24</b> | <b>0.001</b>      |

Asc., ascending; ACE, angiotensin-converting enzyme; ARB, angiotensin-receptor blocker; AVC, aortic valve calcification; CAC, coronary artery calcification; eGFR, estimated glomerular filtration rate; MAC, mitral annular calcification. In bold, statistically significant results.



**Table S5: Univariable analysis of ascending aorta calcification load in the whole cohort, in women and in men**

|                                         | Whole Cohort   |               |              |                   | Women       |              | Men         |                   |
|-----------------------------------------|----------------|---------------|--------------|-------------------|-------------|--------------|-------------|-------------------|
|                                         | Coef.          | Std. Err.     | Beta         | P>t               | Beta        | P>t          | Beta        | P>t               |
| Male Sex                                | <b>-205.88</b> | <b>121.16</b> | <b>-0.09</b> | <b>0.09</b>       | -           | -            | -           | -                 |
| Age (per year)                          | <b>14.61</b>   | <b>5.05</b>   | <b>0.15</b>  | <b>0.004</b>      | 0.16        | 0.07         | <b>0.12</b> | <b>0.05</b>       |
| Body surface area (per m <sup>2</sup> ) | 695.26         | 98.8          | -0.04        | 0.43              | 0.08        | 0.37         | -0.05       | 0.39              |
| Hypertension                            | <b>420.36</b>  | <b>149.93</b> | <b>0.14</b>  | <b>0.01</b>       | <b>0.18</b> | <b>0.04</b>  | 0.12        | 0.06              |
| Hyperlipidemia                          | <b>484.8</b>   | <b>139.48</b> | <b>0.17</b>  | <b>0.001</b>      | <b>0.2</b>  | <b>0.02</b>  | <b>0.17</b> | <b>0.01</b>       |
| Diabetes                                | <b>336.3</b>   | <b>119.95</b> | <b>0.14</b>  | <b>0.01</b>       | <b>0.21</b> | <b>0.02</b>  | 0.1         | 0.12              |
| Coronary artery disease                 | <b>467.23</b>  | <b>113.78</b> | <b>0.2</b>   | <b>&lt;0.0001</b> | <b>0.21</b> | <b>0.01</b>  | <b>0.22</b> | <b>&lt;0.0001</b> |
| eGFR<60 ml/min                          | <b>411.15</b>  | <b>141.43</b> | <b>0.15</b>  | <b>0.004</b>      | 0.15        | 0.10         | <b>0.14</b> | <b>0.02</b>       |
| Current smoker                          | 119.35         | 173.49        | 0.03         | 0.49              | -0.01       | 0.89         | 0.07        | 0.25              |
| ACE inhibitor                           | 205.67         | 123.17        | 0.08         | 0.10              | 0.04        | 0.62         | <b>0.13</b> | <b>0.03</b>       |
| ARB                                     | 56.18          | 121.81        | 0.02         | 0.65              | 0.15        | 0.09         | -0.07       | 0.25              |
| Vitamin K antagonist                    | <b>350.55</b>  | <b>155.11</b> | <b>0.11</b>  | <b>0.02</b>       | 0.17        | 0.06         | 0.06        | 0.38              |
| Statin                                  | <b>420.57</b>  | <b>131.18</b> | <b>0.16</b>  | <b>0.001</b>      | 0.16        | 0.07         | <b>0.18</b> | <b>0.004</b>      |
| Bisphosphonate                          | 308.57         | 175.81        | 0.09         | 0.08              | 0.05        | 0.57         | 0.09        | 0.14              |
| Calcium and/or vitamin D                | 115.87         | 67.49         | 0.09         | 0.09              | 0.07        | 0.46         | 0.06        | 0.35              |
| MAC                                     | 0.07           | 0.04          | 0.09         | 0.07              | 0.14        | 0.12         | 0.04        | 0.49              |
| AVC                                     | -0.04          | 0.04          | -0.06        | 0.27              | 0.01        | 0.93         | -0.06       | 0.32              |
| CAC                                     | <b>0.21</b>    | <b>0.05</b>   | <b>0.23</b>  | <b>&lt;0.0001</b> | <b>0.29</b> | <b>0.002</b> | <b>0.24</b> | <b>0.001</b>      |

*ACE*, angiotensin-converting enzyme; *ARB*, angiotensin-receptor blocker; *AVC*, aortic valve calcification; *CAC*, coronary artery calcification; *eGFR*, estimated glomerular filtration rate; *MAC*, mitral annular calcification. In bold, statistically significant results.
